# Supplementary material for: Salts of rucaparib with dicarboxylic acids: synthesis, crystal structures and solubility
Source: Royal Society of Chemistry journal article supplement (doi:10.1039/d2ce00842d), 2022-01-01
Supplement: d2ce00842d1.pdf [file d2ce00842d1.pdf]

## Supplementary data for

### **Salts of rucaparib with dicarboxylic acids: synthesis, crystal structures and solubility aspects**

**Chao Wu, Lu Gao, Jing Xiong, Xia-Lin Dai,\* Wei Gao, Tong-Bu Lu, Jia-Mei**

**Chen\***

**Table S1.** Outcome of cocrystallization screening of RUC with different CFs.

| API       | CFs                         | Experimental results |
|-----------|-----------------------------|----------------------|
| Rucaparib | Adipic acid                 | Salt                 |
| Rucaparib | Pimelic acid                | Salt                 |
| Rucaparib | Fumaric acid                | Salt                 |
| Rucaparib | Gallic acid                 | Physical mixture     |
| Rucaparib | Vanillic acid               | Physical mixture     |
| Rucaparib | Urea                        | Physical mixture     |
| Rucaparib | Piperazine                  | Physical mixture     |
| Rucaparib | Orotic acid                 | Physical mixture     |
| Rucaparib | Taurine                     | Physical mixture     |
| Rucaparib | <i>L</i> -(-)-Malic acid    | Physical mixture     |
| Rucaparib | Isonicotinamide             | Physical mixture     |
| Rucaparib | Mandelic acid               | Physical mixture     |
| Rucaparib | <i>L</i> -(+)-Ascorbic acid | Physical mixture     |
| Rucaparib | Glutaric acid               | Physical mixture     |
| Rucaparib | Malonic acid                | Physical mixture     |
| Rucaparib | Glycolic acid               | Physical mixture     |
| Rucaparib | Aspartame                   | Physical mixture     |
| Rucaparib | Oxamide                     | Physical mixture     |
| Rucaparib | <i>D</i> -Biotin            | Physical mixture     |
| Rucaparib | Protocatechuic acid         | Physical mixture     |
| Rucaparib | 3,5-Dihydroxybenzoic acid   | Physical mixture     |
| Rucaparib | Sorbic acid                 | Physical mixture     |
| Rucaparib | Citric acid                 | Physical mixture     |
| Rucaparib | 4-Hydroxybenzoic acid       | Physical mixture     |
| Rucaparib | Hippuric acid               | Physical mixture     |
| Rucaparib | Syringic acid               | Physical mixture     |
| Rucaparib | Allantoin                   | Physical mixture     |
| Rucaparib | Meglumine                   | Physical mixture     |
| Rucaparib | <i>L</i> -Aspartic acid     | Physical mixture     |
| Rucaparib | Riboflavin                  | Physical mixture     |
| Rucaparib | Nicotinamide                | Physical mixture     |
| Rucaparib | Suberic acid                | Physical mixture     |

**Table S2.** Data of powder dissolution experiments of RUC salts.

|                    | RUC/S-CA      | RUC/FA        | RUC/AA        | RUC/PA        |
|--------------------|---------------|---------------|---------------|---------------|
| $S_{\max}$ (mg/mL) | $2.9 \pm 0.2$ | $2.0 \pm 0.1$ | $4.2 \pm 0.2$ | $4.7 \pm 0.1$ |
| fold               | 1             | 0.69          | 1.4           | 1.6           |

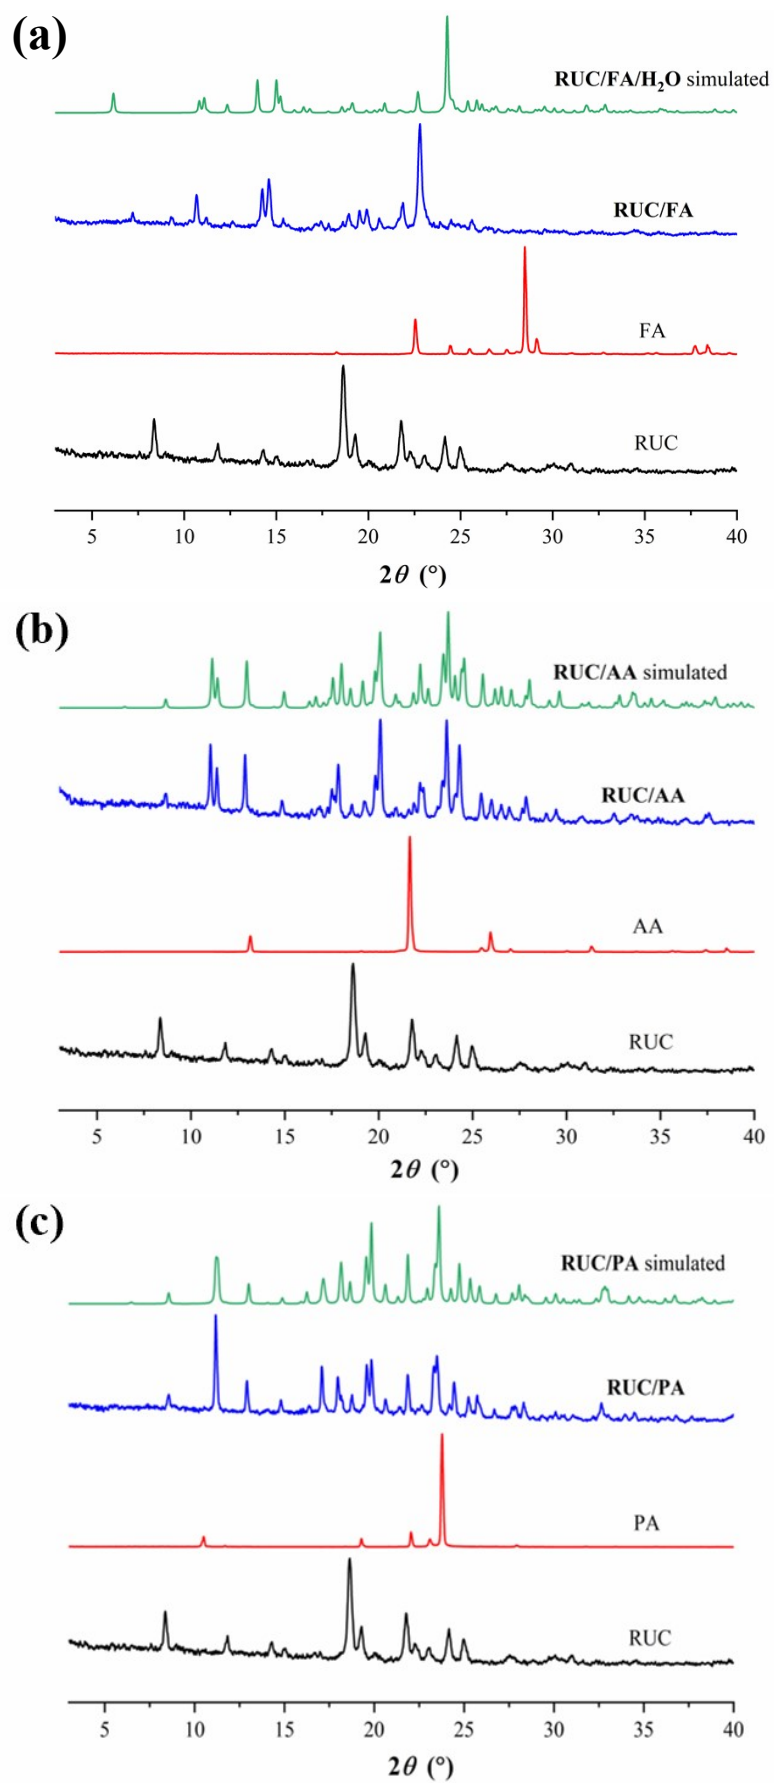

**Fig. S1** PXRd patterns of RUC, FA/AA/PA and the synthesized salts, and simulated from SXRD data for (a) RUC/FA, (b) RUC/AA and (c) RUC/PA.

Fig. S2 TG-DSC curves of (a) RUC/FA, (b) RUC/AA and (c) RUC/PA.

(a)

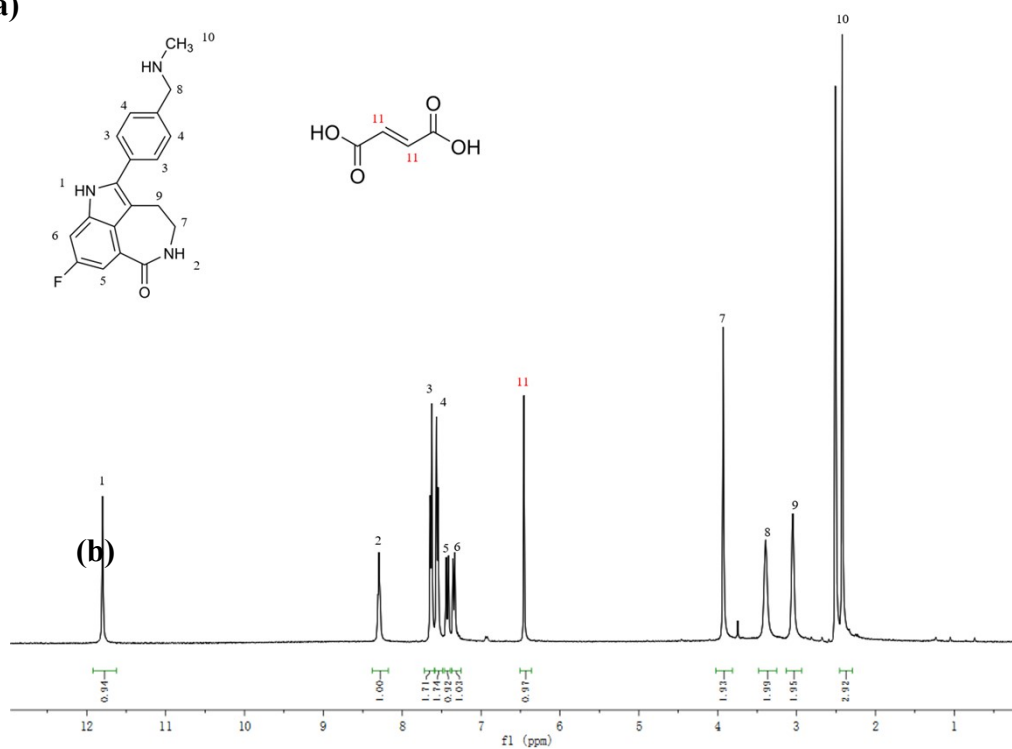

(b)

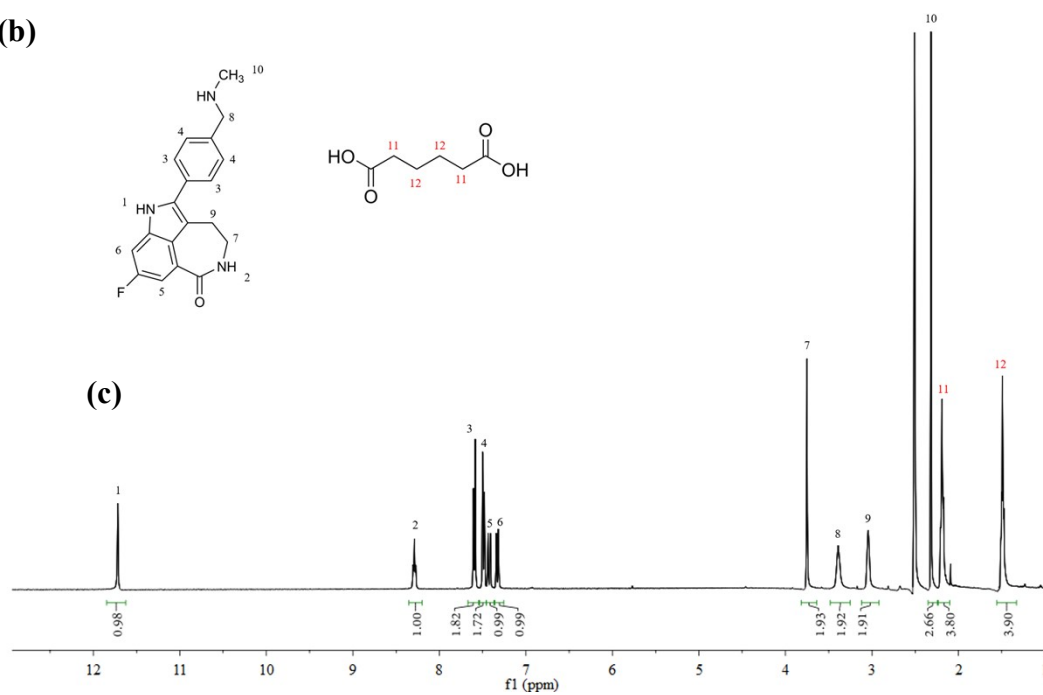

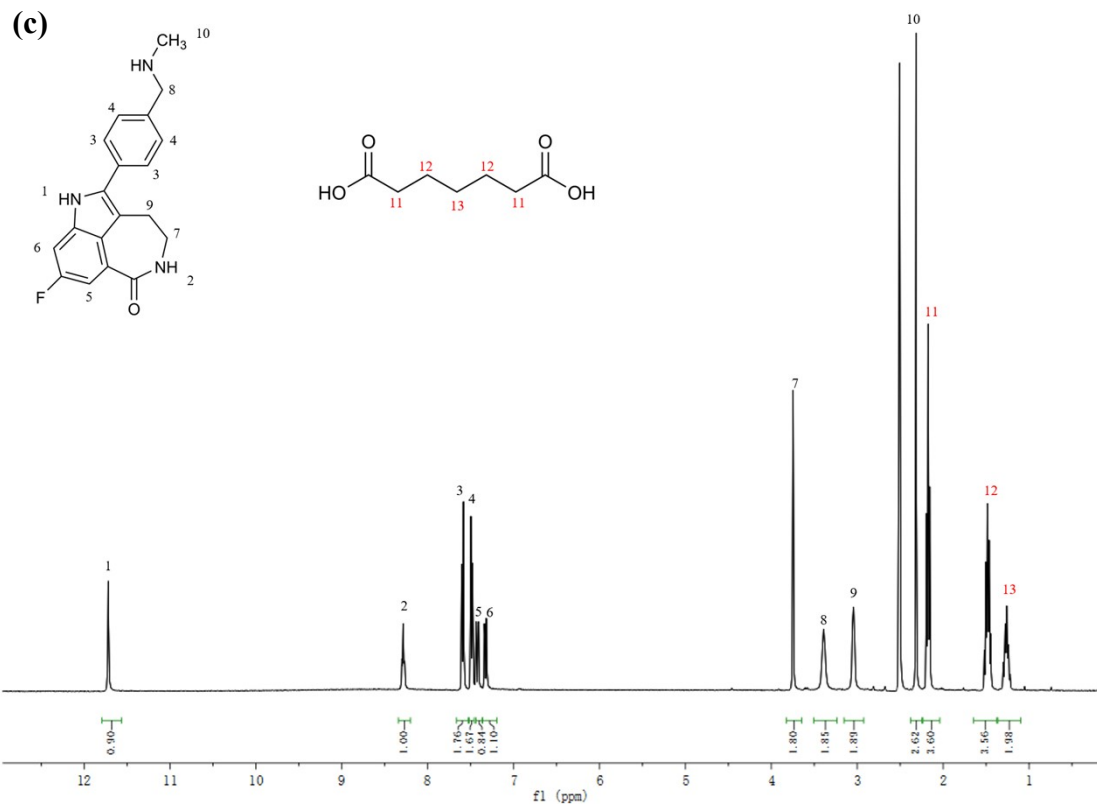

**Fig. S3**  $^1\text{H}$  NMR spectra of (a) RUC/FA, (b) RUC/AA and (c) RUC/PA.

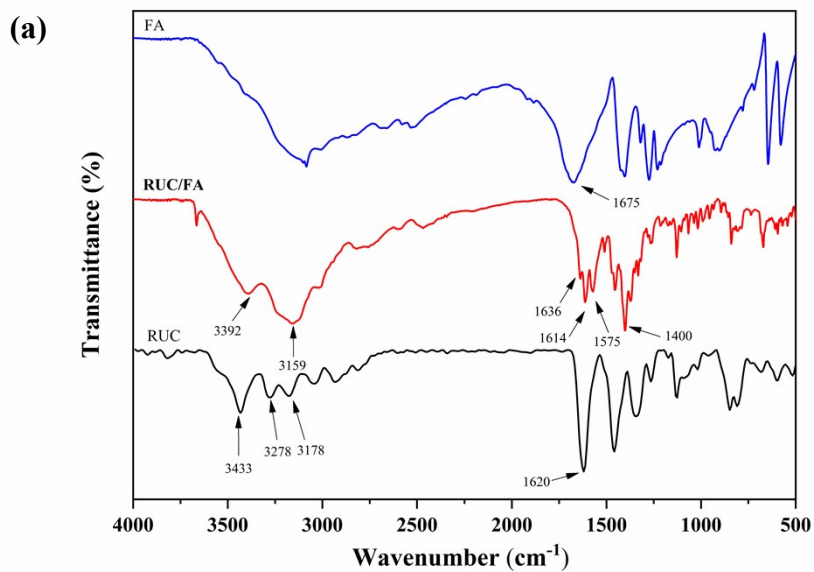

**Fig. S4** FT-IR spectra of (a) RUC/FA, (b) RUC/AA and (c) RUC/PA.

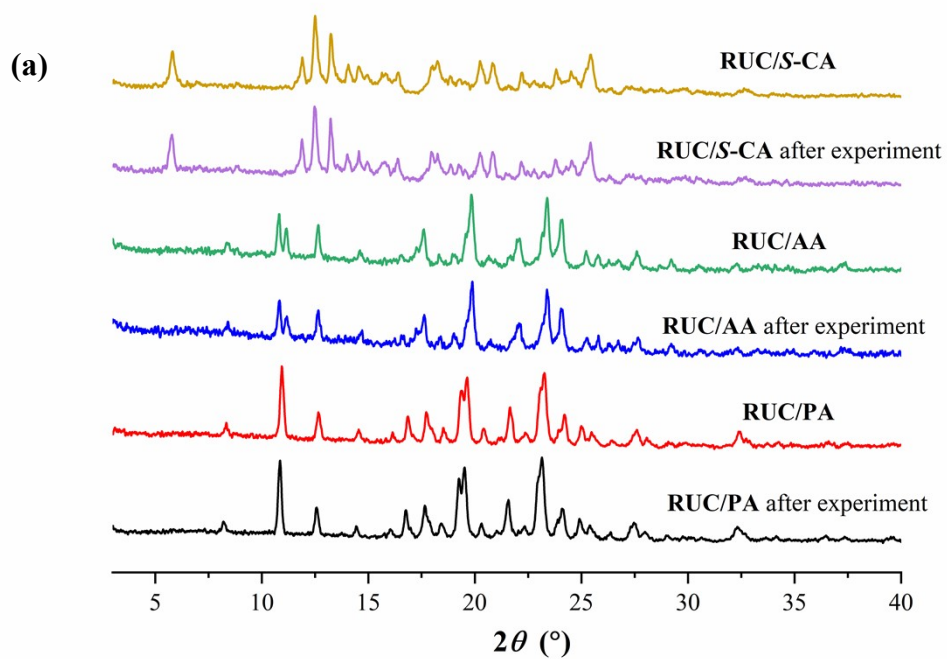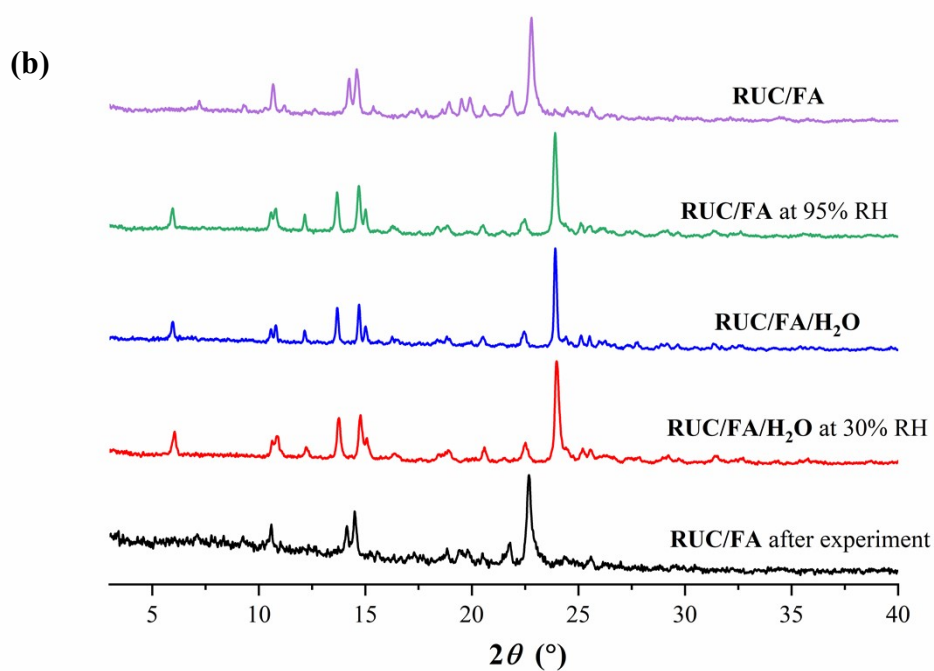

**Fig. S5** PXR D patterns of (a) RUC/S-CA, RUC/AA and RUC/PA and (b) RUC/FA before and after DVS tests.

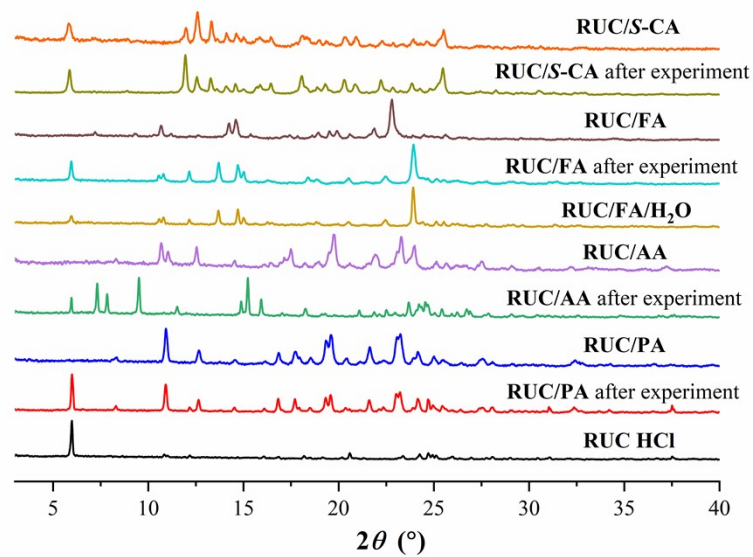

**Fig. S6** PXRD patterns of residual solids after powder dissolution experiments for **RUC/S-CA**, **RUC/FA**, **RUC/AA** and **RUC/PA**.

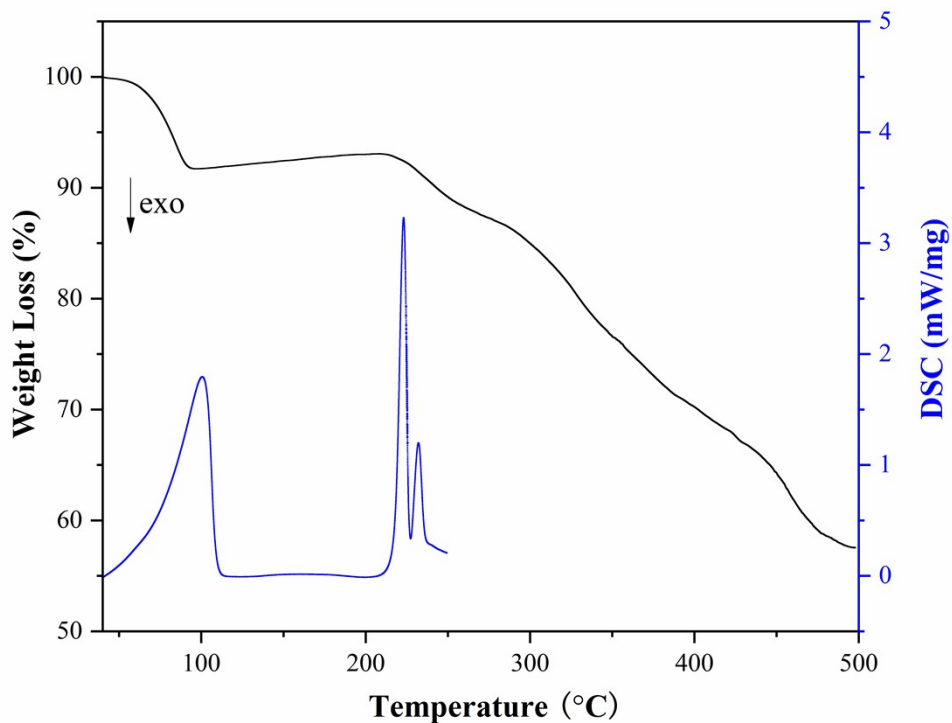

**Fig. S7** TG-DSC curves for **RUC/AA/H<sub>2</sub>O**.

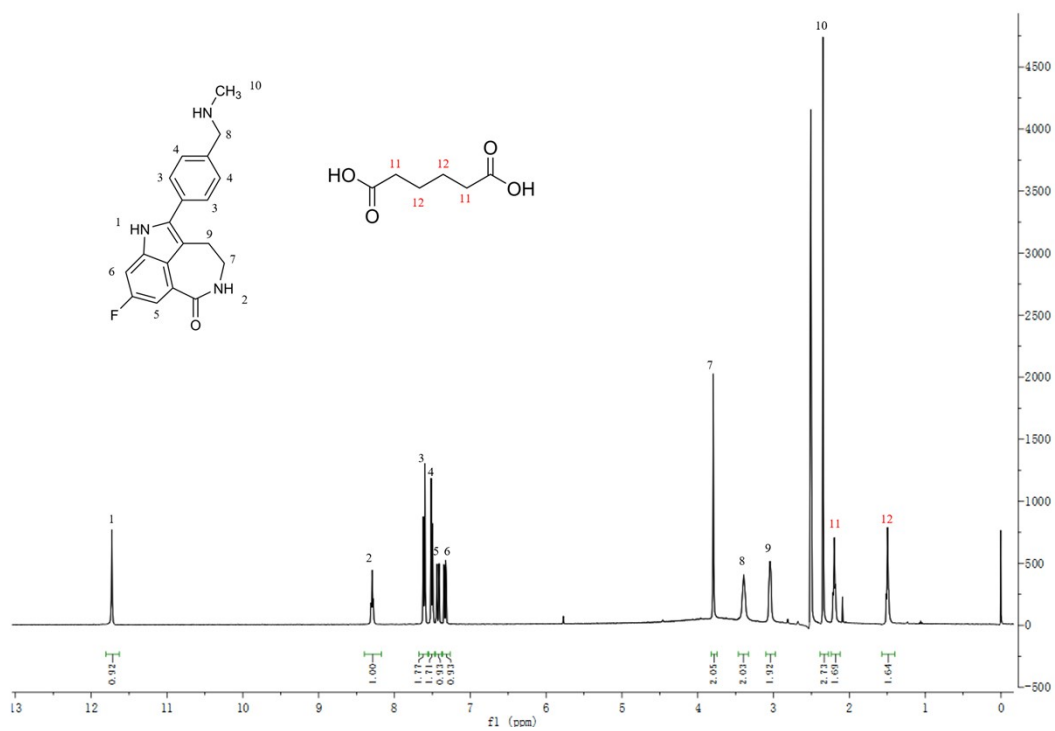

**Fig. S8**  $^1\text{H}$  NMR spectra of RUC/AA/H<sub>2</sub>O.

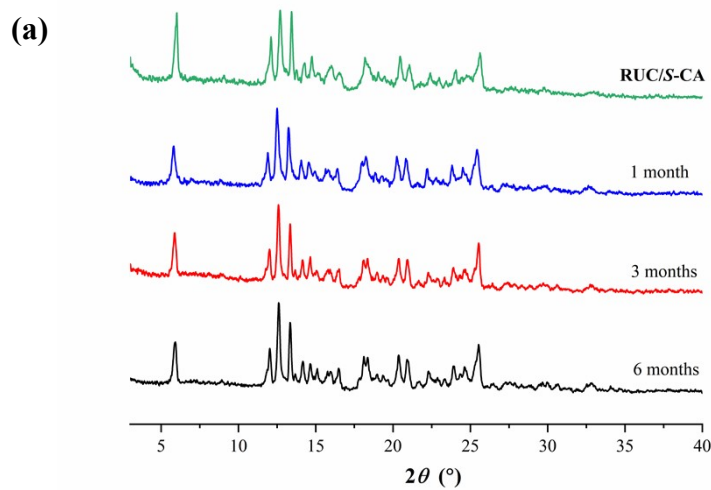



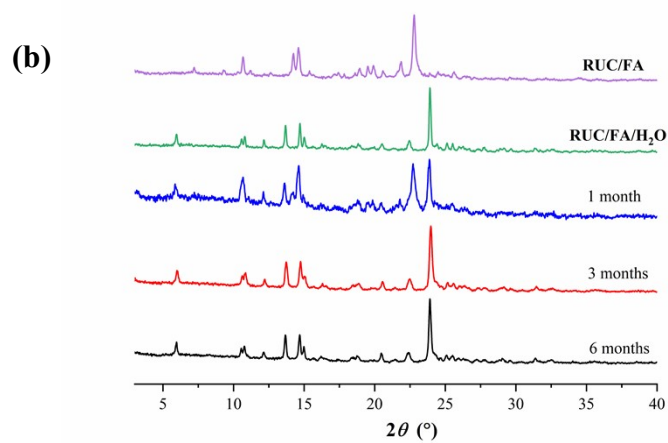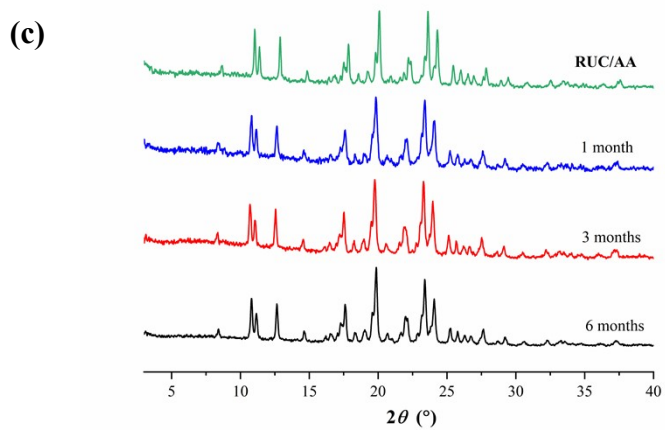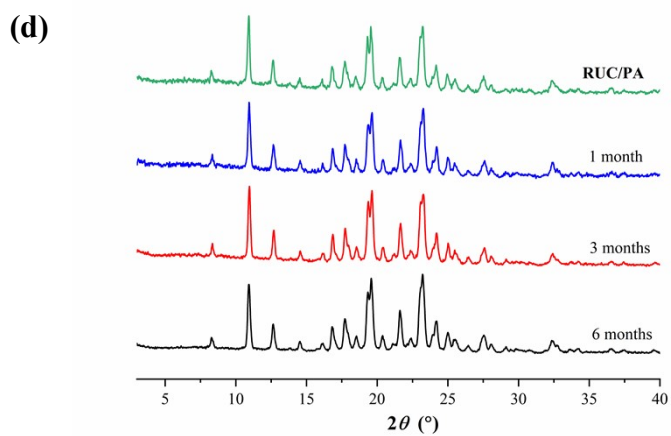

**Fig. S9** PXRd patterns of (a) RUC/S-CA, (b) RUC/FA, (c) RUC/AA and (d) RUC/PA after accelerated stability tests.
